# Supplementary material
Source: Springer Nature journal article supplement (https://www.springermedizin.de/resource/supplementary/12990_2011_392_MOESM2_ESM.pdf/9613168)

**A**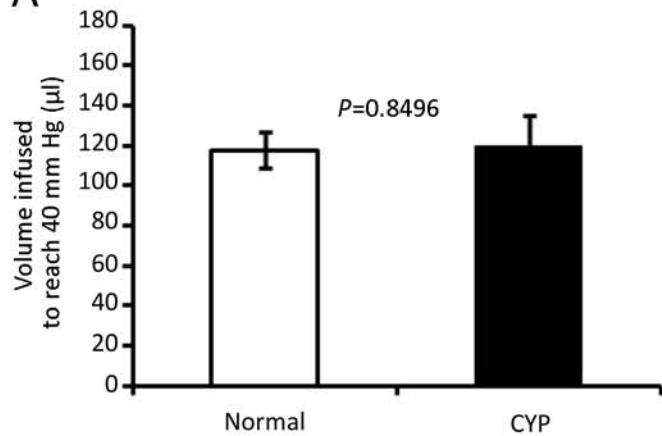**B**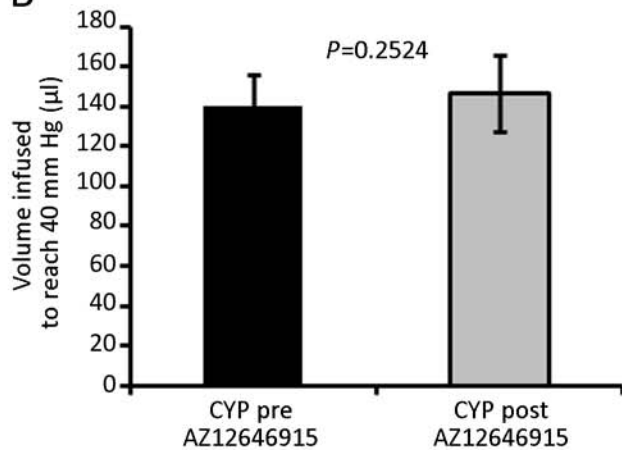**C**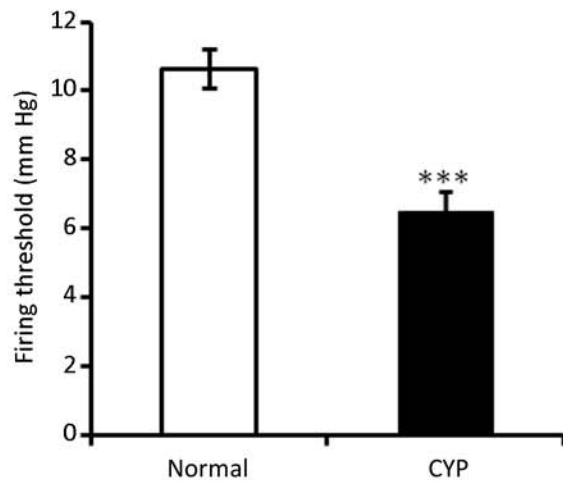**D**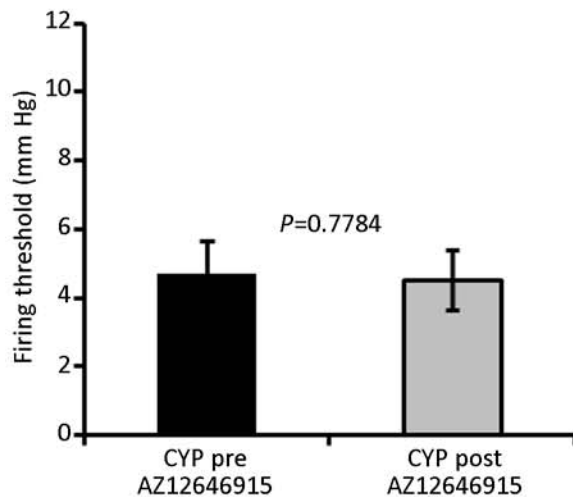

Supplement: MOESM2 [file 9613168]
